# PP2A<sub>1</sub> Binding, Cell Transducing and Apoptotic Properties of Vpr<sub>77–92</sub>: A New Functional Domain of HIV-1 Vpr Proteins

Angélique N. Godet<sup>1</sup>\*, Julien Guergnon<sup>1</sup>\*, Amélie Croset<sup>1</sup>, Xavier Cayla<sup>2</sup>, Pierre Barthélemy Falanga<sup>1</sup>, Jean-Hervé Colle<sup>3</sup>, Alphonse Garcia<sup>1</sup>\*

**1** Laboratoire E3 Phosphatases, Unité Signalisation Moléculaire et Activation Cellulaire, Institut Pasteur, Paris, France, **2** Physiologie de la Reproduction et des Comportements, INRA CNRS UMR 6175, Université de Tours, Haras Nationaux, IFR 135, Nouzilly, France, **3** Unité de Biologie des Populations Lymphocytaires, CNRS-URA 1961, Institut Pasteur, Paris, France

## Abstract

**Background:** The hallmark of HIV-1 pathogenesis is the progressive CD4<sup>+</sup> T cell depletion and high propensity of CD4<sup>+</sup> T cells to apoptosis. HIV-1 viral protein R (Vpr) is a major pro-apoptotic gene product. A first Vpr-mediated apoptotic mechanism that requires a physical interaction of HIV-1 Vpr<sub>71–82</sub> mitochondriotoxic domain containing the conserved sequence <sub>71</sub>-HFRIGRHSRIG-<sub>82</sub> with the Adenine Nucleotide Translocator (ANT) has been characterized. The family of Ser/Thr protein phosphatase PP2A interacts with several viral proteins to regulate cell growth and apoptotic pathways. Previous studies based on yeast two hybrid assays and mutational experiments indicated that PP2A<sub>1</sub> is involved in the induction of G2 arrest by HIV-1 Vpr.

**Principal Findings:** Experiments combining pull-down, cell penetration and apoptosis analyses in distinct human cells indicate that the PP2A<sub>1</sub> binding sequence from Vpr<sub>77–92</sub> is a new cell penetrating apoptotic sequence. We also found that the I84P mutation or the IIQ/VTR<sub>83–85</sub> and T89A substitutions in the Vpr<sub>77–92</sub> sequence prevent PP2A<sub>1</sub> binding, cell penetration and apoptosis. In addition the double R77A and R80A mutation known to inactivate the mitochondriotoxic Vpr<sub>71–82</sub> domain, has no effect on the biological properties of the Vpr<sub>77–92</sub> domain.

**Conclusion:** Together our data provide evidence for the first time that the Vpr<sub>77–92</sub> sequence delineates a biological active domain of Vpr with PP2A<sub>1</sub> binding and pro-apoptotic capacities and, it is conceivable that this cell penetrating sequence may account for the Vpr internalization in uninfected cells. Finally, our data also implicate the existence of two partially overlapping pro-apoptotic domains in the Vpr C-terminal part, a redundancy that represents a new approach to address the question of biological relevance of HIV-1 Vpr. In this context, future studies will be required to determine the functional relevance of the Vpr<sub>77–92</sub> domain in full length Vpr protein and also in entire HIV provirus.

**Citation:** Godet AN, Guergnon J, Croset A, Cayla X, Falanga PB, et al. (2010) PP2A<sub>1</sub> Binding, Cell Transducing and Apoptotic Properties of Vpr<sub>77–92</sub>: A New Functional Domain of HIV-1 Vpr Proteins. PLoS ONE 5(11): e13760. doi:10.1371/journal.pone.0013760

**Editor:** Roberto F. Speck, University Hospital Zurich, Switzerland

**Received:** July 9, 2010; **Accepted:** September 30, 2010; **Published:** November 1, 2010

**Copyright:** © 2010 Godet et al. This is an open-access article distributed under the terms of the Creative Commons Attribution License, which permits unrestricted use, distribution, and reproduction in any medium, provided the original author and source are credited.

**Funding:** This work was supported by the Institut-Pasteur. A.N.G. is a recipient of a Ministère Recherche et Technique (MRT) fellowship from the French Government. A.C. was supported by Institut-Pasteur. J.G. was supported by Caisse Nationale de Maladie (CANAM). The funders had no role in study design, data collection and analysis, decision to publish, or preparation of the manuscript.

**Competing Interests:** The authors have declared that no competing interests exist.

\* E-mail: agarcia@pasteur.fr

† These authors contributed equally to this work.

‡ Current address: INSERM UMR-S 945, Laboratoire Infection et Immunité, Université Pierre et Marie Curie, Paris, France

## Introduction

HIV infection leads to the depletion of CD4<sup>+</sup> T cells in patients. The CD4<sup>+</sup> T cells depletion of non-infected CD4<sup>+</sup> T cells has been correlated to an increased propensity to apoptosis, which relays on induced host and viral factors [1]. HIV-1 Viral Protein R (Vpr) is one of the regulatory HIV-1 proteins that are important for *in vivo* establishment and/or maintenance of AIDS pathogenesis. Multiple studies indicate that Vpr regulates viral replication *in vivo* and is required for virus replication in non-dividing cells. In addition, Vpr induces cell cycle arrest in proliferating cells, stimulates virus transcription and can induce apoptosis of infected cells [2].

Previous studies also suggested that Vpr can induce apoptosis in distinct human cells as a consequence of the prolonged cell cycle arrest [3,4]. Other reports have clearly documented a major apoptotic mechanism which is based on the physical interaction of Vpr with the Adenine Nucleotide Translocator (ANT), a component of the permeability transition pore of mitochondria localized in the inner mitochondrial membrane [5,6]. This mitochondriotoxic domain contains Vpr<sub>71–82</sub> sequence that is partially located at the end of the third  $\alpha$ -helix of Vpr (Vpr<sub>55–77</sub>). Vpr is actively secreted when it is produced during the end part of the virus cycle and has been found in biological fluids of patients. Interestingly it is capable of permeating uninfected cells and may be responsible for bystander effect.

The reversible phosphorylation of proteins controlled by protein kinases and protein phosphatases is a major mechanism that regulates a wide variety of cellular processes. Protein phosphatase type 2A (PP2A) represents a major family of serine/threonine protein phosphatases that has been implicated in the regulation of many cellular events, including cell growth and apoptosis in mammalian cells [7]. PP2A proteins comprise dimeric or heterotrimeric enzymes. The dimeric PP2A core enzyme consists of a catalytic C subunit (PP2Ac) and a structural A subunit. A third subunit (B, B', B'' or B''') can eventually bind to the core and regulate both the substrate specificity and localization of the trimeric holoenzyme. PP2A<sub>1</sub> is a trimeric form composed of A, B $\alpha$  and C subunit [8]. To specifically compete with the binding of regulatory subunits to PP2A core or to PP1 catalytic subunit, we previously described a novel approach named Drug Phosphatase Technology (DPT). This approach is based on the use of penetrating peptide sequences that interact with PP1/PP2A holoenzymes to specifically disrupt or modulate apoptotic pathways [9].

In this study, we first identify 89.6-Vpr<sub>77-92</sub> sequence as a PP2A<sub>1</sub> binding domain. In addition we showed that IIQ/VTR<sub>83-85</sub> and T89A substitutions in the pNL4.3-Vpr<sub>77-92</sub> sequence, inhibits PP2A<sub>1</sub> binding and apoptosis. These results suggest that PP2A<sub>1</sub>-binding site of Vpr<sub>77-92</sub> C-terminal sequences control the cell penetrating death activities of this new functional domain. Altogether, these data allow us to define DPT-Vpr<sub>1</sub>, a new cell penetrating death molecule, derived from the sequence of 89.6-Vpr<sub>77-92</sub>.

## Results

### Vpr<sub>72-92</sub> is a PP2A<sub>1</sub> binding sequence

Since previous experiments have indicated that the cell PP2A<sub>1</sub> holoenzyme is involved in the mode of action of Vpr, we explored whether Vpr and PP2A<sub>1</sub> could establish physical interaction by performing affinity chromatography. Recombinant full length Vpr-T protein encoded by the HIV-1 (89.6 isolate) was coupled with column agarose beads and purified PP2A<sub>1</sub> holoenzyme was chromatographed on the column. Phosphorylase a phosphatase activity was found exclusively in the fractions eluted by salinity gradient and picking at 0.3M NaCl (Fig. 1A). In addition, the phosphatase activity from both eluted Vpr-Agarose column and from purified PP2A<sub>1</sub>, display a similar sensitivity to protamine stimulation indicating the conservation of PP2A<sub>1</sub> subunit composition and enzymatic properties after Vpr-agarose binding (Fig.S1). Furthermore, to identify Vpr sequences able to bind *in vitro* to PP2A<sub>1</sub>, a series of 43 overlapping dodecapeptides from 89.6-Vpr were synthesized onto a cellulose membrane. The membrane was incubated with purified PP2A<sub>1</sub> holoenzyme or with isolated PP2A<sub>1</sub> subunits. Three overlapping peptides corresponding to a docking site, named site 1, that binds to trimeric PP2A<sub>1</sub> holoenzyme were detected (Fig. 1B). Similarly two overlapping peptides corresponding to the same PP2A<sub>1</sub> docking site 1 were also detected when the membrane was incubated with the structural PP2A-A subunit (Fig. 1B). In addition, we also detected four overlapping peptides that define a second putative binding site, named site 2, for PP2A-A subunit. In contrast, no interactive spot was detected with purified PP2A-B $\alpha$  and PP2Ac subunits (data not shown). These data allowed to identify RHRIGIIQQRRTRNG (Fig.1C) as a new Vpr sequence that binds *in vitro* to the PP2A<sub>1</sub> holoenzyme through its structural PP2A-A subunit.

### The 89.6-Vpr<sub>77-92</sub> peptide sequence interacts with PP2A<sub>1</sub> in cell extracts

We further characterized the capacity of Vpr<sub>77-92</sub> domain to bind PP2A<sub>1</sub>. By using streptavidine magnetic beads, we attempted

the PP2A<sub>1</sub> co-precipitation following incubation of extracts from a variety of cell lines with biotinylated peptides relaying to the Vpr<sub>77-92</sub> the docking site 1 sequence. The sequence alignments of Vpr proteins and the different peptides tested are respectively listed in Table 1 and Table 2. Both DPT-Vpr<sub>1</sub> and DPT-Vpr<sub>3</sub>, that respectively correspond to the wild type and a mutated Vpr<sub>77-92</sub> sequence of 89.6 viral isolate, pulled down PP2A<sub>1</sub> in cell extracts. DPT-Vpr<sub>3</sub> varied from DPT-Vpr<sub>1</sub> by the replacement of three residues by a residue A at the positions R72, R75 and T89. In contrast the IIQ/VTR<sub>83-85</sub> substitutions or the single residue replacement (I84P) corresponding to DPT-Vpr<sub>2</sub> and Vpr<sub>4</sub> peptides respectively prevented detection of any PP2A<sub>1</sub> subunit in the pull down samples (Fig. 1D, Fig. S2 and Fig. S3, and data not shown). Taken together the pull down experiments account for the specific binding of DPT-Vpr<sub>1</sub> peptide to PP2A<sub>1</sub>. Our results also suggest, that in addition to the residue I84, the other residues in vicinity (residues 83–85) play a critical role for the targeting the PP2A<sub>1</sub>-binding domain. Future genetic analyses will be required to address their contribution.

### The Vpr<sub>77-92</sub> sequence from HIV-1 89.6 strain is a new cell penetrating domain

It is well established that Tat peptides derived from the cell penetrating protein HIV-1 Tat are cell penetrating sequences that allow intracellular delivery of proteins. Tat transduction depends on various factors, and current protocols permit the transduction into many cells [10]. Since Vpr is a known as cell penetrating protein, we hypothesized that DPT-Vpr peptides containing the Vpr<sub>77-92</sub> sequence could also display a transduction activity. To test whether DPT-Vpr peptides display similar activity, biotinylated DPT-Vpr peptides were assessed to penetrate and to deliver a protein marker (Streptavidin-HRP) into HeLa cells. As shown in figure 2A, Tat, DPT-Vpr<sub>1</sub>, DPT-Vpr<sub>2</sub> and DPT-Vpr<sub>3</sub> peptides penetrate into HeLa cells. However, Tat and DPT-Vpr peptides showed subtle cell staining differences concerning their intracellular localization. While Tat, DPT-Vpr<sub>1</sub> and DPT-Vpr<sub>3</sub> mostly provided a homogeneous cytoplasm labeling, DPT-Vpr<sub>2</sub> provided also nuclear/nucleolar labeling. Then the capacity of the biotinylated DPT-Vpr peptides to cargo protein into cell was analyzed. The amounts of HRP internalized by incubating the cells for five hours with three different biotinylated DPT-Vpr Streptavidin-HRP complexes were shown in figure 2B. DPT-Vpr<sub>1</sub> and DPT-Vpr<sub>3</sub> peptides (50  $\mu$ M) resulted in higher levels of HRP internalization than Tat-peptide, the positive reference of the assay (16.7 and 45.3 fold increase respectively). Although DPT-Vpr<sub>2</sub>, was found able to permeate cells (Fig. 2A), surprisingly no cargo effect could be detected with cells incubated with Streptavidin-HRP linked to biotinylated-DPT-Vpr<sub>2</sub>, the signal recorded remained as low as the cells control incubated with the media plus Streptavidin-HRP alone. Thus the lack of cargo effect with DPT-Vpr<sub>2</sub> peptide correlated with its inability of binding to PP2A<sub>1</sub> from cell extracts.

### The Vpr<sub>77-92</sub> sequence from HIV-1 89.6 strain is a new cell death domain

Given the critical role of PP2A in the control of apoptotic events and in consistence with the rational of our DPT concept, we hypothesized that DPT-Vpr<sub>1</sub> could contain a naturally occurring pro-apoptotic DPT-sequence. To test this possibility, we first used TUNEL assay to monitor apoptosis in adherent HeLa or neuronal SK-N-SH cells. Figure 3A illustrates the high apoptotic level obtained in SK-N-SH cells treated with DPT-Vpr<sub>1</sub> and DPT-Vpr<sub>3</sub>, in contrast, DPT-Vpr<sub>2</sub> has no significant effect. This

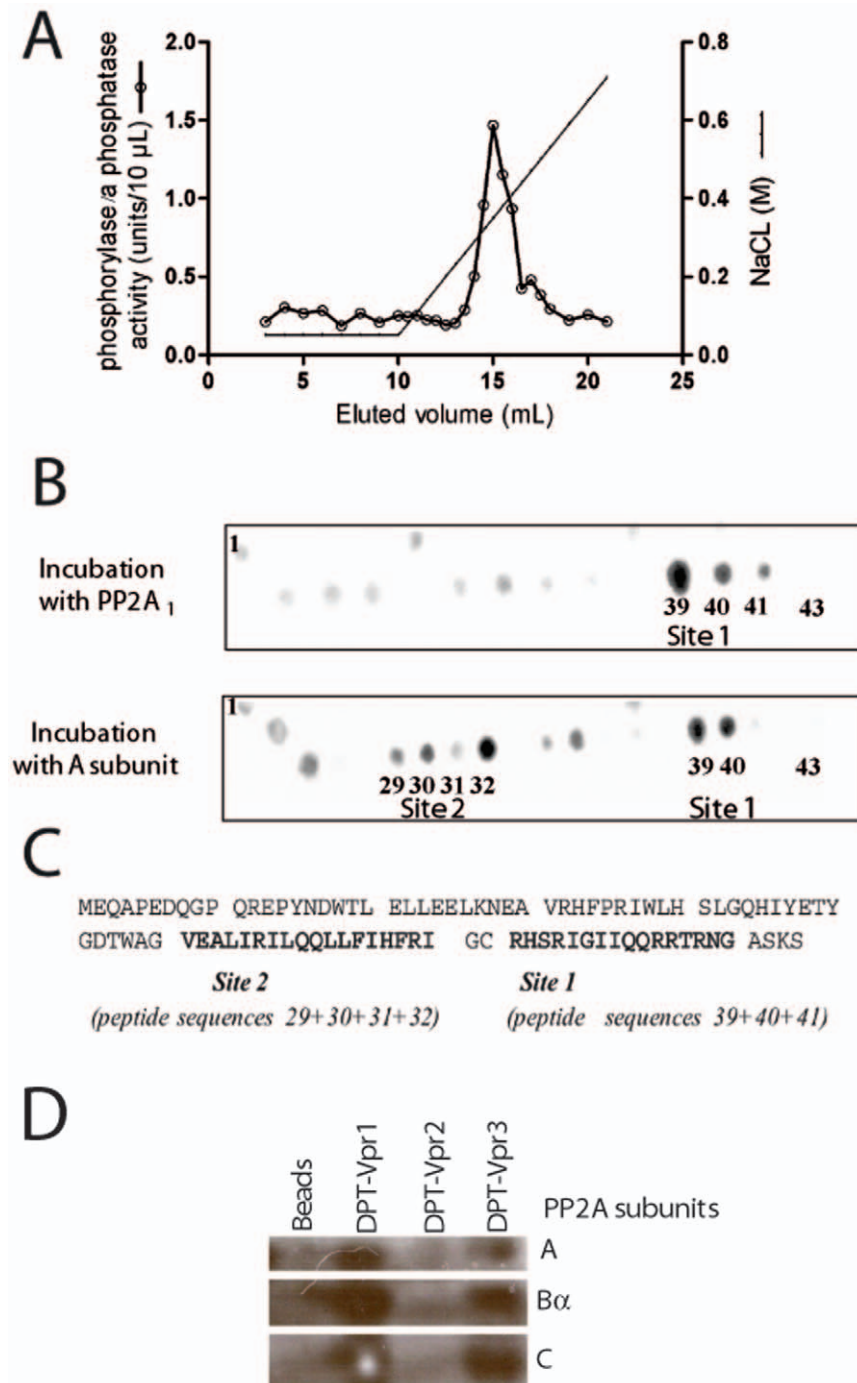

**Figure 1. Analysis of HIV-1 Vpr and PP2A1 interaction.** (A) 16  $\mu$ g of PP2A1 holoenzyme purified from pig brain was loaded on a 1 mL HIV-1 strain 89.6-Vpr-T-agarose column equilibrated in buffer C (25 mM TrisHCl pH 7.4, 50 mM NaCl, 0.1 mM EDTA). The column was washed with 10 mL of buffer C and then developed with a 18 mL linear gradient of buffer C to buffer C plus 1 M NaCl. Phosphatase activity of collected fractions was assayed with phosphorylase a as substrate (1U = 1 pm of phosphate liberated by 10  $\mu$ L of fraction/min). A major peak of phosphatase activity was detected, eluting at 0.3 M NaCl. (B) ECL revelation of PP2A binding assay on cellulose-bound Vpr peptides. 43 overlapping dodecapeptides with a two-amino acid shift scanning the entire 89.6-Vpr sequence (accession number: AAA81039) were synthesized on a cellulose membrane. The membrane was incubated with PP2A1 holoenzyme (upper panel) or PP2A-A subunit (lower panel) and subsequently with anti-PP2A antibodies followed by peroxidase-labelled anti-guinea pig antibodies. (C) Sequence of HIV-1 Vpr protein: sequence of the two PP2A-A binding sites are indicated in bold. These sequences correspond to overlapping sequences of positive dodecapeptides 29 to 32 (PP2A-A subunit incubation) or 39 to 41 (PP2A1 incubation). (D) Co-precipitation of DPT-Vpr peptides with PP2A1 in HeLa cell extracts. Control magnetic beads coupled with streptavidin alone or conjugated with DPT-Vpr peptides at a concentration of 100  $\mu$ M, were incubated with cells extracts (5.105 cells). Identification of bound proteins in pull-down experiments was realized by immunoblotting using antibodies against PP2A1 subunits A, B $\alpha$  and C.  
doi:10.1371/journal.pone.0013760.g001

**Table 1.** Sequence alignment of Vpr proteins from two different origins.

| ORIGIN | SEQUENCES                                 |                     |                  |                 |    |    |
|--------|-------------------------------------------|---------------------|------------------|-----------------|----|----|
|        | <i>HELIX I</i>                            |                     |                  | <i>HELIX II</i> |    |    |
|        | 1                                         | 10                  | 20               | 30              | 40 | 50 |
| 89.6   | MEQAPEDQGPQREPYNDWTLLELLEELKNEAVRHFPRIW-  |                     |                  |                 |    |    |
|        | LHSLGQHIYETY                              |                     |                  |                 |    |    |
| NL4.3  | MEQAPEDQGPQREPYNEWTLLELLEELKSEAVRHFPRIWL- |                     |                  |                 |    |    |
|        | HNLGQHIYETY                               |                     |                  |                 |    |    |
|        | 60                                        | 70                  | 80               | 90              |    |    |
|        | <i>HELIX III</i>                          |                     |                  |                 |    |    |
| 89.6   | GDTWTGVEALIRILQQLLFI                      | <i>HFRIGCRHSRIG</i> | <i>IIQQRTRNG</i> | <i>ASKS</i>     |    |    |
| NL4.3  | GDTWTGVEALIRILQQLLFI                      | <i>HFRIGCRHSRIG</i> | <i>VTRQRARNG</i> | <i>ASRS</i>     |    |    |
|        | ***                                       | *                   |                  |                 |    |    |

Single letter code for amino acids (aa) is used. The three  $\alpha$ -helices are Helix I, aa 17–33, Helix II, aa 38–50 and Helix III, aa 56–77. Variable sequence of the PP2A<sub>1</sub> binding domain (77–92) is in red. Non variable sequence of mitochondrial death domain is in italic (71–82). \*Asterisks indicate distinct residues in 89.6-Vpr (accession number: AAA81039) and Vpr<sub>pNL4.3</sub> (accession number: AF324493) that are located in PP2A<sub>1</sub> binding domain. Mutational studies in yeast, suggested that the T89A substitution in NL4.3-Vpr has no apoptotic effect [46]. The K95R substitution in 89.6-Vpr is outside of PP2A<sub>1</sub>-death domain. doi:10.1371/journal.pone.0013760.t001

apoptotic effect was quantified in both HeLa and SK-N-SH cells and we found that DPT-Vpr<sub>1</sub> and DPT-Vpr<sub>3</sub> induce apoptosis in 60 to 75% of the cells (Fig. 3B). DPT-Vpr<sub>1</sub> and DPT-Vpr<sub>3</sub>-mediated apoptosis was also assayed in non-adherent Jurkat T cells using Annexin V, an early marker of apoptosis. As indicated in figure 4 upper panel, DPT-Vpr<sub>1</sub> and DPT-Vpr<sub>3</sub> peptides but not DPT-Vpr<sub>2</sub>, induced phosphatidylserine translocation. Furthermore we also analyzed a possible drop in mitochondrial membrane potential ( $\Delta\Psi_m$ ), an earlier event in apoptosis. We found that similarly to Vpr<sub>71–96</sub>, a control peptide containing the mitochondrial death domain from pNL4.3 [11], DPT-Vpr<sub>1</sub> and DPT-Vpr<sub>3</sub> but not DPT-Vpr<sub>2</sub> induced a decrease in  $\Delta\Psi_m$  (Fig. 4 lower panel). All together these results indicate that the Vpr<sub>77–92</sub> sequence from 89.6 isolate is a new PP2A<sub>1</sub>-binding death domain. Interestingly divergent residues with 89.6 Vpr<sub>77–92</sub> sequence are located in the Vpr<sub>77–92</sub> domains from a previously published long-term non progressive (LTNP) cohort [12].

**Table 2.** Origin of peptides containing wild type and mutated Vpr sequences derived from 89.6 and pNL4.3 sequences used in this study.

| ORIGIN | ACRONYM               | SEQUENCES                         |
|--------|-----------------------|-----------------------------------|
| 89.6   | DPT-Vpr <sub>1</sub>  | RHSRIGIIQQRTRNG                   |
| NL4.3  | DPT-Vpr <sub>2</sub>  | RHSRIG <b>VTRQRARNG</b>           |
| 89.6   | DPT-Vpr <sub>3</sub>  | <b>AHSAIGIIQQRARNG</b>            |
| 89.6   | DPT-Vpr <sub>4</sub>  | RHSRIG <b>PQQRTRNG</b>            |
| NL4.3  | *Vpr <sub>71–96</sub> | HFRIGCRHSRIG <b>VTRQRARNGASRS</b> |

-Mutated residues in DPT-Vpr<sub>3</sub>/DPT-Vpr<sub>4</sub> peptides containing Vpr<sub>77–92</sub> sequences derived from 89.6 and divergent residues from pNL4.3 in DPT-Vpr<sub>3</sub> and in \*Vpr<sub>71–96</sub> are in bold.

\*From Arunagiri et al.<sup>11</sup>

doi:10.1371/journal.pone.0013760.t002

## Discussion

Vpr is a small basic protein that seems to be well conserved in HIV-1, HIV-2 and SIV [13]. However the sequence of the non-helical C-terminal portion, Vpr<sub>71–96</sub>, appears to be divergent in HIV-2 and SIVmac and previous results indicate that HIV-1 Vpr proteins contain a specific and highly conserved mitochondrial death domain [14] (see table 3). In this work for the first time we reported on biological activity of Vpr<sub>77–92</sub>, a short sequence located on C-terminal part of Vpr delineated by the residues (77–92). We demonstrated that this sequence is a second apoptotic domain.

### The Vpr<sub>77–92</sub> sequence is a new multifunctional biological domain with PP2A<sub>1</sub>-binding, cell penetrating and cell death properties

Initial studies based on yeast two hybrid experiments suggested that Vpr interacts with the structural PP2A-A subunit and can induce cell cycle arrest [15,16]. Furthermore, the role of PP2A in Vpr-induced G<sub>2</sub> arrest was previously analyzed by pharmacological and genetic analyses in yeast and in mammalian cells [17,18,19,20,21]. Here, based on biochemical studies we have found that the trimeric PP2A<sub>1</sub> holoenzyme binds to full length Vpr protein. Using peptide bound assays we clearly found that Vpr can interact with the PP2A-A subunit. Furthermore, we determined two distinct sequences, Vpr<sub>57–73</sub> named site 2 and Vpr<sub>77–92</sub> named site 1, that interact with the structural PP2A-A subunit. However, only site 1 is able to bind PP2A<sub>1</sub> holoenzyme. This may suggest that the A subunit of the trimeric PP2A<sub>1</sub> holoenzyme could contain a masked docking region for site 2 which appears to be accessible on the isolated PP2A-A subunit. Furthermore since site 2 is located in the third helix of HIV-1 Vpr it is conceivable that this kind of helical structure cannot interact with the trimeric PP2A<sub>1</sub> holoenzyme. Indeed, this position also corresponds to a Leu/Ile-rich domain (amino acids 60–81), which is critical for dimerization [22] and therefore this domain should be unable to intracellularly interact with PP2A<sub>1</sub>. These observations clearly suggest that site 2 represents a cryptic and possibly a non functional PP2A-binding sequence. Furthermore PP2A<sub>1</sub> binding specificity of DPT-Vpr<sub>1</sub>, a peptide containing the site 1 sequence, was substantiated by testing several peptides modified by residue substitution. We found that the IIQ/VTR<sub>83–85</sub> substitutions or the single residue substitution I84P prevented the PP2A<sub>1</sub> binding. In contrast the double substitution, R77A and R80A, allowed the binding to PP2A<sub>1</sub> holoenzyme.

According to Drug Phosphatase-Technology concept PP2A interacting sequences could represent new biologically active cell penetrating peptides [9]. It is well established that, similarly to some cationic peptides, Tat peptide derived from the HIV-1 Tat protein possessed protein transduction activity. Compared to the activity of Tat peptide, DPT-Vpr<sub>1</sub> has a more potent activity in transporting streptavidin-HRP molecules. In contrast the DPT-Vpr<sub>2</sub> peptide that contains the IIQ/VTR<sub>83–85</sub> and T89A substitutions is unable to deliver streptavidin-HRP molecules into HeLa cells. This result suggests that intracellular transduction is favored by the specific interaction with PP2A<sub>1</sub> when peptide is in the cell. A similar situation has been previously observed using PP1, PP2A or PKA interacting sequences coupled to inactive non-transducing shuttle DPT-sh1 [9,23]. Previous studies showed that the C-terminal moiety of Vpr LAI strain (containing the residues 52–96) possessed transducing activity in human cell lines [24]. Vpr<sub>55–91</sub> sequence containing our newly identified PP2A<sub>1</sub> binding domain is the most efficient transducing sequence. In addition, Taguchi *et al.*, [25] identified a shorter

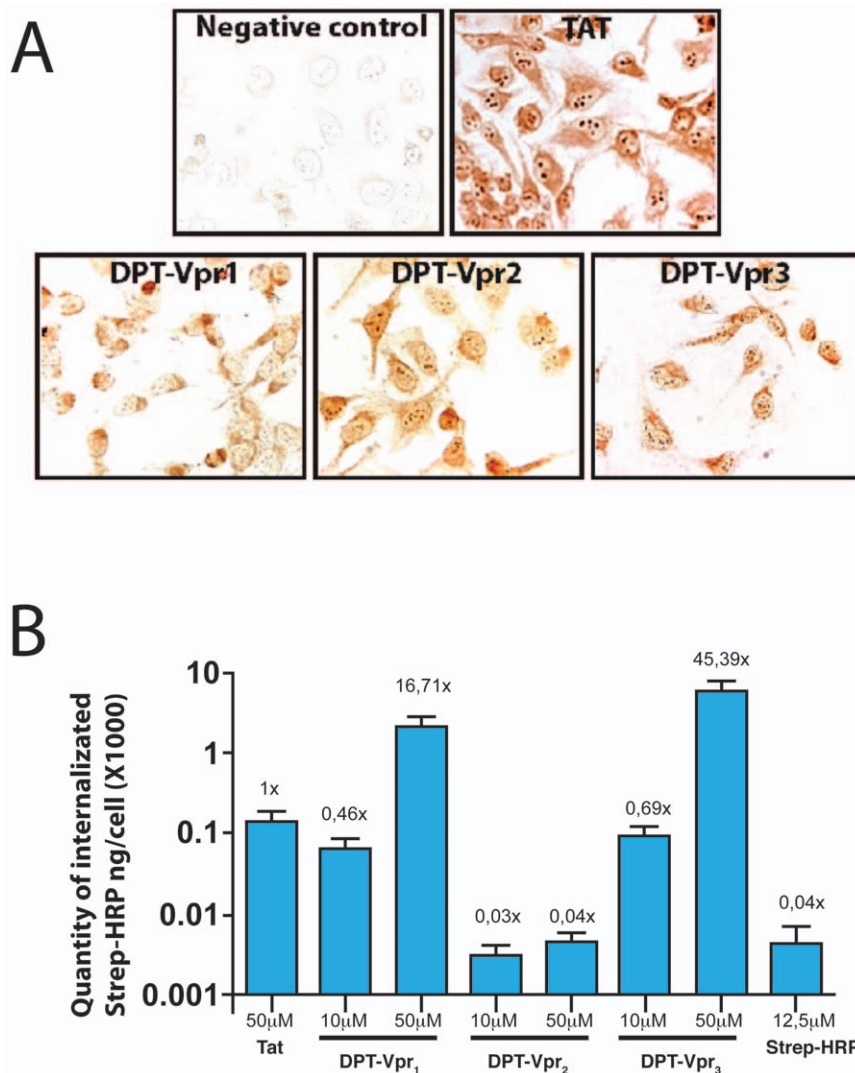

**Figure 2. Effect of DPT-Vpr peptides on cell penetration and intracellular delivery of streptavidin-peroxydase.** (A) For penetration and localization analysis, cells were incubated with 150 μM of peptides for 2 h at 37°C. After fixation, the presence of biotinylated peptides is revealed by incubation of permeabilized cells with streptavidin-peroxydase. The sequence of non penetrating peptide used as negative control is GVIFYLRDK. The sequence of positive Tat control is YGRKRRQR. (B) Intracellular delivery of streptavidin-peroxydase by biotinylated-DPT-Vpr and Tat peptides in HeLa cells. Streptavidin-peroxydase coupled with biotinylated peptides were incubated for 6 h at 37°C and internalized complexes were visualized by a colorimetric test. Statistical analysis was carried out using Anova's test and significance was assessed at  $p < 0.0001$ . doi:10.1371/journal.pone.0013760.g002

sequence DTWPGVEALIRILQQLLFH FRIGCQH corresponding to the residues 52–78 of the third  $\alpha$ -helix domain of HIV-1 Vpr as a new cell penetrating sequence with transducing activity. It is noteworthy that both Vpr<sub>55–91</sub> and Vpr<sub>52–78</sub> respectively contain the *in vitro* PP2A-A binding site 2 and the site 1 sequences identified in this study. In accordance with our published DPT-concept, this observation highlights a potential general role of PP2A in transducing efficiency. Further studies will however be required to establish a possible biological relevance of Vpr site 2 in PP2A-mediated transduction pathways. Previous reports indicate that full length Vpr or peptides with sequences derived from the C terminus Vpr proteins enter the cell and cause death of human cells and yeast cells [5,11,26]. This death effect requires the presence of a short C-terminal domain containing the conserved mitochondrial death sequence 71-HFRIGCRHSRIG<sub>-82</sub>.

### The Vpr<sub>77–92</sub> domain : a new approach to decipher Vpr-induced apoptosis in human cells

An area of studies has documented the capacity of Vpr to induce apoptosis. Few intracellular Vpr targets that may direct different mechanisms of apoptosis pathways have been identified. Previous reports indicate that Vpr association with a Cul4A-containing E3 ligase complex via its association with DCAF1 prevents ubiquitination and degradation of cellular protein required for cell cycle progression [27]. The possibility that Vpr association with this complex may be a causality link between cell cycle control arrest and apoptosis occurrence has recently garnered credit. Residues distantly spread on Vpr (Q3, Q65, R77, R80) have been found to play some role in G2 cycle arrest illustrating the fact that whole part of the protein is required for active cell cycle arrest. Interestingly the R80A substitution renders also Vpr inactive for cell cycle arrest but the R77A and R80A

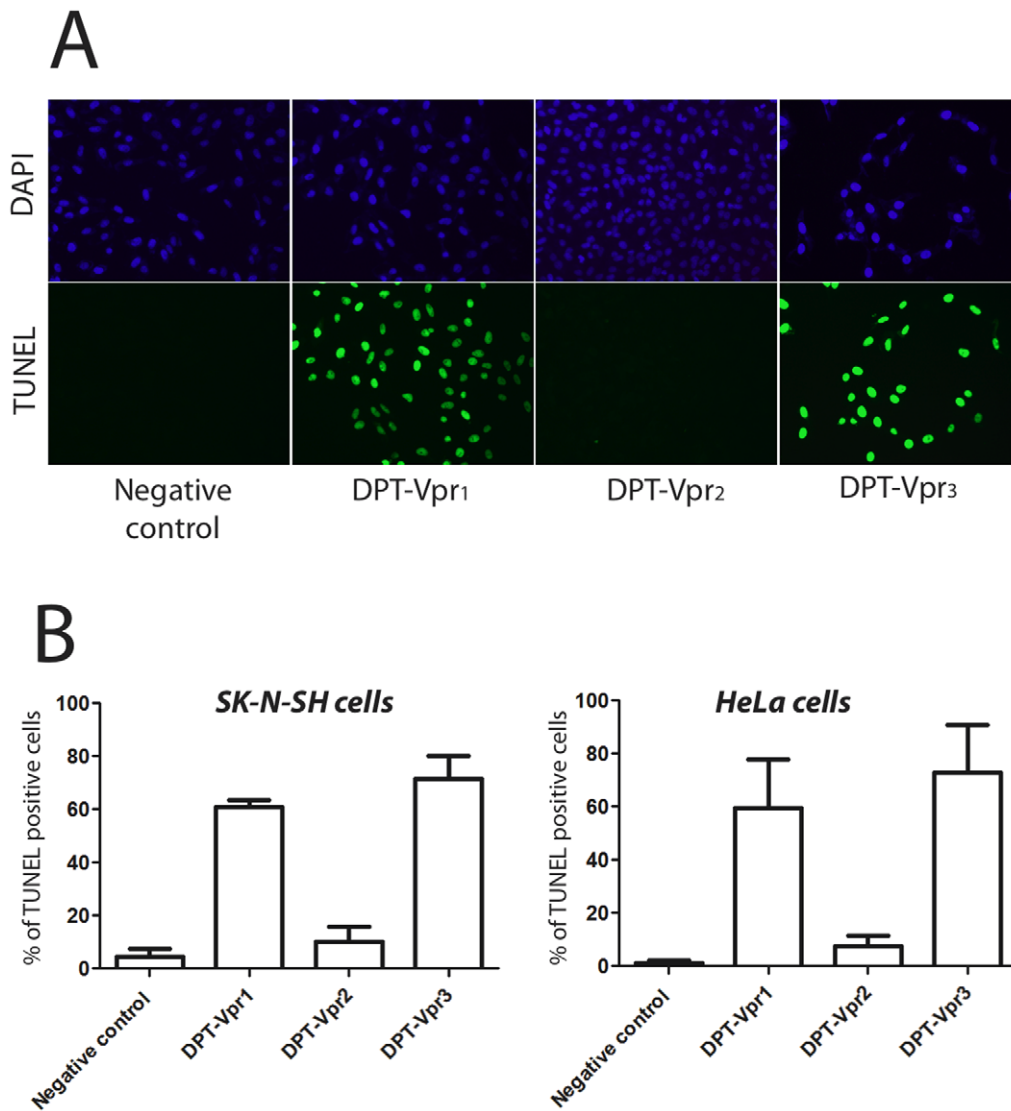

**Figure 3. Effect of DPT-Vpr peptides on cell death.** (A) Nuclear morphology illustrated with SK-N-SH cells was evaluated with DAPI (blue) and DNA strand breaks were identified using TUNEL labeling (green). (B) Histograms show percentages of positive SK-N-SH cells (left panel) or HeLa cells (right panel) detected in TUNEL assay.  
doi:10.1371/journal.pone.0013760.g003

substitutions that affect direct binding of Vpr 71–82 to ANT and inactivate the mitochondriotoxic domain activity did not prevent apoptosis induction [28]. By testing these substitutions with DPT-Vpr<sub>3</sub> we did not find obvious impact on the pro apoptotic property of our new Vpr<sub>77–92</sub> domain suggesting that both ANT and PP2A binding domains regulate Vpr-mediated apoptosis. Indeed ANT and PP2A<sub>1</sub> binding domains have a seemingly redundant ability to direct an apoptosis process indicating that the Vpr<sub>71–92</sub> sequence is a new structural and functional domain.

It was previously published that the mutation R77Q of HIV-1 Vpr frequently occurs in HIV-1 infected Long Term Non Progressor (LTNP) patients [12]. This mutation impairs the molecular interaction of HIV-1 Vpr proteins with ANT resulting in inactivation of the mitochondrial Vpr<sub>71–80</sub> death domain [14]. However this is a controversial observation, more recently challenged by studies reporting that the mutation R77Q can't be associated to reduce HIV-1 infectivity [29]. Interestingly, since Vpr is also present in the body fluids of HIV-1 patients including

plasma and CSF [30,31], it is conceivable that both soluble full length Vpr proteins and C-terminal processed fragments could induce a bystander death effect in non-infected CD4+ cells. We also can hypothesize that Vpr<sub>77–92</sub> sequence from entire or C-terminal processed protein sharing the penetrating properties of 89.6- Vpr<sub>77–92</sub> sequence, should penetrate and provoke apoptosis in both infected or non infected cells.

Neurocytopathic effects induced by a recombinant Vpr molecule in neuronal cells suggest that Vpr is involved in the genesis of neurological disorders [32,33,34,35]. In addition, it has been shown that Vpr can be found in brain section of HAND patients, specifically in astrocytes and neurons [36] and neuronal cell death was observed in these patients, concomitantly with the presence of Vpr protein and transcripts [37]. Furthermore, in contrast to peptides containing the mitochondriotoxic sequence (residues 71–82), the peptidic sequences spanning the C-terminal domain of Vpr (residues 52–96 or 70–96) induced apoptosis in cultured rat cortical and striatal neurons [38]. These data imply

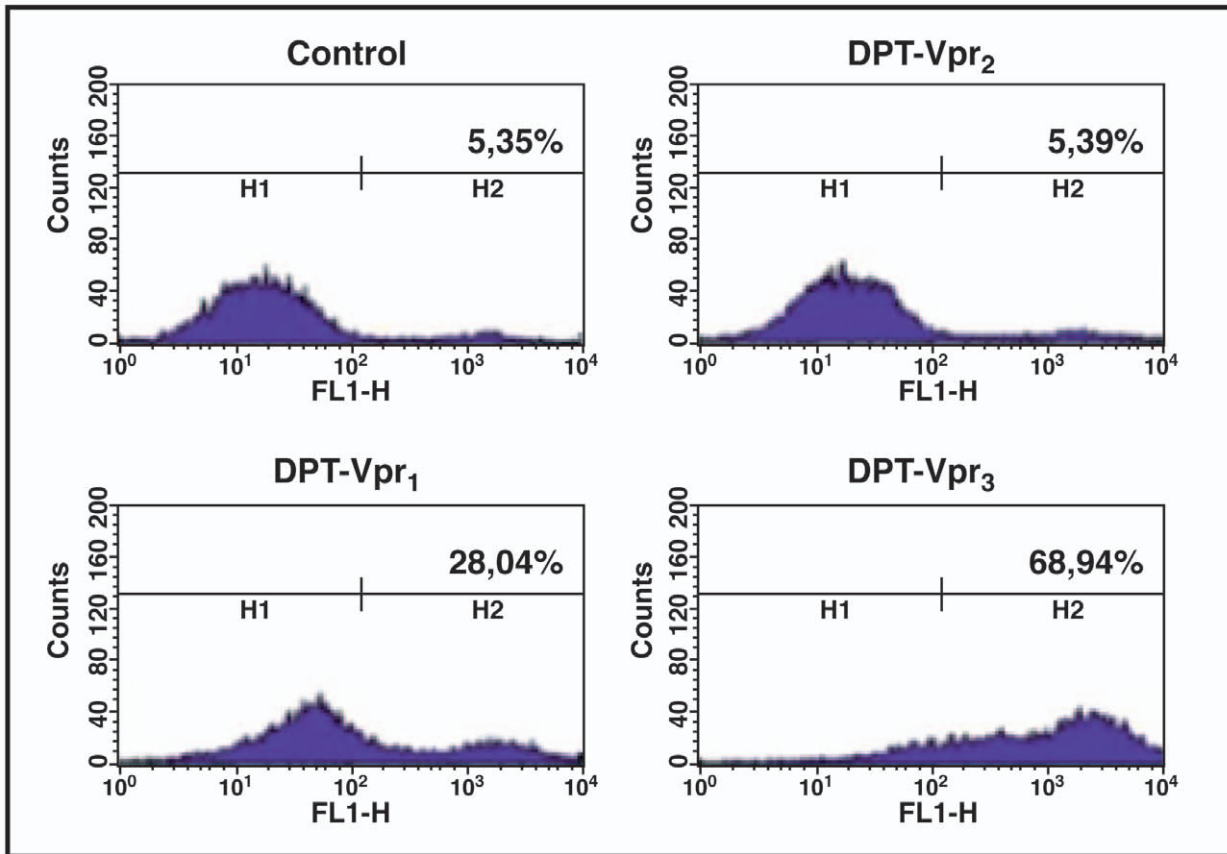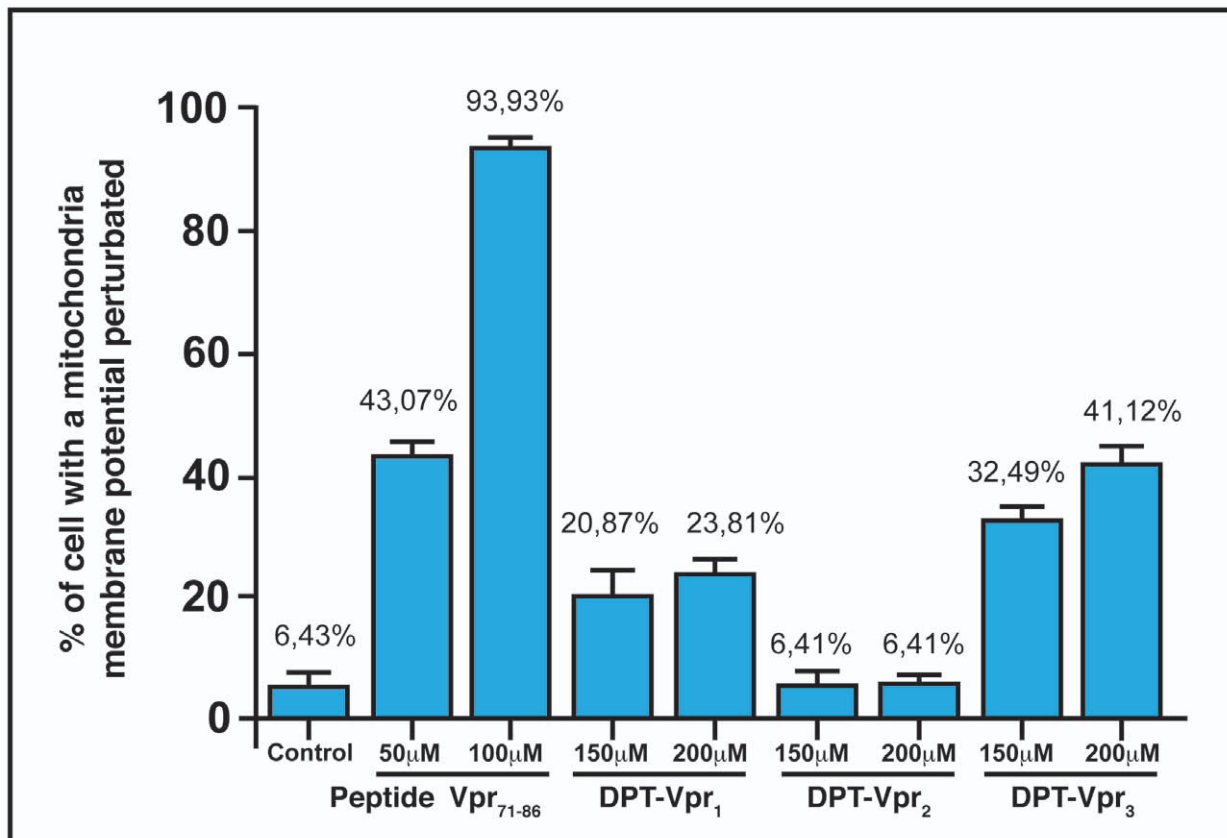

**Figure 4. To monitor apoptosis in Jurkat cells treated with DPT-Vpr peptides, we used Annexin V (upper panel) or DiOC6 (lower panel) assays.** For DiOC6 statistical analysis was by Anova and significance was set at  $p < 0.05$ . doi:10.1371/journal.pone.0013760.g004

that a direct interaction between Vpr and ANT alone is inefficient to induce apoptotic pathway in neurons [38,39]. Interestingly, our cell death experiments in neuron derived SK-N-SH cells indicate that DPT-Vpr<sub>1</sub> is also potently active in neuronal cells. In consistence with the existence of soluble forms of Vpr in biological fluids, our results likely suggest a biological effect of our new biologically active Vpr<sub>77-92</sub> domains in Vpr-mediated neurodegeneration.

In conclusion, our identification of a new biological domain has multiple consequences for development of future researches in HIV-1 field. First it is a priority to study whether or not the Vpr<sub>77-92</sub> domain is biologically active in the context of the full length Vpr protein and of HIV replication. Interestingly, the complex structural organization of the *vpr* gene with two overlapping pro-apoptotic sequences raises several questions about its biological relevance. We can speculate that such gene organization should increase genomic information to counteract the HIV genomic variation occurrence. In addition the existence of overlapping ANT and PP2A<sub>1</sub> binding sequences may lead to eventual binding competition between the two ANT and PP2A<sub>1</sub> pro-apoptotic cell targets. Because Vpr is prone to be interacting with an area of cells, such as infected resting and/or activated cells and non-infected cells, it is conceivable that either pathway may concern preferentially alternate cell phenotypes.

In addition our results suggest the hypothesis that non active sequences of the new PP2A<sub>1</sub>-dependant Vpr<sub>77-92</sub> death domain could be implicated as a regulator of long-term non-progression as well as a viral pathogenicity factor. Especially, functionally active PP2A<sub>1</sub> binding Vpr<sub>77-92</sub> death sequences in HIV-1 isolates should be a positive event for AIDS progression and potential development of HIV Associated Dementia (HAD). Focusing on the case of HAD, since some ART treatments don't cross the blood-brain barrier [36,37], it will be important to identify new DPT-peptides or/and to design new chemical drugs that compete with Vpr<sub>77-92</sub> PP2A<sub>1</sub> binding sequence. Such synthetic blockers of the Vpr<sub>77-92</sub> domain/PP2A<sub>1</sub> interaction will obviously have an impact on the HIV-1 pathogenesis. More generally, the use of new DPT-peptides targeting PP2A<sub>1</sub> will be useful to study different neurodegenerative diseases such as Tauopathies in which PP2A<sub>1</sub> plays an important role [40]. These molecules should have a more specific action than currently available drugs.

**Table 3. Amino acid sequence alignment of Vpr proteins from different origins in the vicinity of mitochondriotoxic and PP2A-dependent death domains.**

| ORIGIN          | SEQUENCES                                     |
|-----------------|-----------------------------------------------|
| HIV-1 89.6-Vpr  | <u>71</u> -HFRIGC RHSRIG IIQRRTRNG- <u>92</u> |
| HIV-1 LAI-Vpr   | -----A---                                     |
| HIV-1 NL4.3-Vpr | -----VTR---A---                               |
| HIV-2 GH1-Vpr   | -L-A--NR---S QTRRR-PFP-                       |
| SIVmac-Vpr      | ---G-I-----QPGGGNPLSA                         |

Vpr<sub>71-92</sub> sequence from 89.6 isolate contains the two distinct overlapping mitochondriotoxic Vpr<sub>71-82</sub> and PP2A Vpr<sub>77-92</sub> death domains. Non-identical residues in HIV-1 (LAI and NL4.3), HIV-2 (GH1) and SIVmac are shown.

doi:10.1371/journal.pone.0013760.t003

## Materials and Methods

### Kits and Reagents

An 8 well Lab-Tek II Chamber Slide, Nalge Nunc International), streptavidin Horse Radish Peroxidase conjugate (Euro-medex), 3,3'-diaminobenzidine tetrahydrochloride (DAB) of DAB Substrate Kit for Peroxidase (Vector laboratories), "complete mini EDTA free" protease inhibitor cocktail from Roche, O-Phenylenediamine-dihydrochloride (OPD) tablet from Sigma chemical, Annexin-V-FITC from Roche, DiOC<sub>6</sub>(3) from Sigma, Kit DeadEnd<sup>TM</sup> Fluorometric TUNEL system product (Promega), FluorSave<sup>TM</sup> Reagent from Calbiochem, Vectashield mounting medium for fluorescence, with DAPI (Vector Laboratories), Trypsin EDTA, Invitrogen.

### Cell Culture and Reagents

Adherent HeLa cells (American Type Culture Collection (ATCC): CCL-2, Manassas, VA) were cultured in Dulbecco's modified Eagle's medium (D-MEM, Invitrogen) as exponentially growing sub confluent monolayers in micro plates or in 12-, 24- or 96- well plates. Jurkat lymphoid T cells (clone E6, ATCC: TIB-152) were cultured in RPMI 1640 Glutamax Medium (Gibco; Invitrogen). Both cell lines were cultured in medium supplemented with 10% fetal calf serum (Invitrogen). Adherent SK-N-SH cells (neuroblastoma cells, ATCC: HTB-11) were cultured in DMEM Glutamax-I-High Glucose (Gibco) with 10% fetal calf serum (Gibco/BRL).

### Peptides

High-performance liquid chromatography-purified NH<sub>2</sub>-biotinylated peptides (purchased from Neosystem) were prepared by solid-phase peptide synthesis. Peptides were dissolved in DMSO and stored at 4°C until use or in half of EtOH and 150 mM NaCl and stored at -20°C pending use.

### Vpr, PP2A proteins and antibodies

Full length HIV-1 89.6-Vpr was prepared in a 6-his C-term tagged form (Vpr-T) by expression in bacteria as described previously [41,42]. Vpr-T agarose column was generated by binding Vpr-T onto a nickel charged iminodiacetic acid-Sepharose-4B (Amersham Biosciences). Protocol for purification of PP2A proteins: trimeric PP2A<sub>1</sub> purification from pig brain was adapted from methods previously described [43]. Preparation of recombinant PP2A-A, PP2A-B $\alpha$  and PP2A-C proteins as well PP2A antibodies (polyclonal guinea pig anti-A, or anti-B and anti-C subunits) has been previously described [44]. In western-blot anti-Guinea Pig-HRP were used to 1/5000 (DAKO P0141).

### In vitro phosphatase assay

<sup>32</sup>P-labeled phosphorylase *a* was prepared by phosphorylation of phosphorylase *b* with phosphorylase kinase and the phosphorylase phosphatase activity was assayed as described previously [43].

### PP2A-binding assays on cellulose-bound Vpr peptides

Overlapping dodecapeptides scanning the whole Vpr sequence were prepared by automated spot synthesis (Abimed, Langerfeld, Germany) onto an amino-derived cellulose membrane, as described [45]. Membrane was blocked using SuperBlock (Pierce),



incubated with purified PP2A-A, PP2A-B $\alpha$ , PP2A-C subunit or PP2A<sub>1</sub> holoenzyme and after several washing steps, incubated with anti-PP2A antibodies, followed by PO-conjugated secondary antibody. Positive spots corresponding to PP2A-binding peptides were visualized using the ECL system.

### Pull down assays to detect interaction of biotinylated peptides with PP2A<sub>1</sub> target

Biotinylated peptides were pre-incubated 2 h at 100  $\mu$ M or 200  $\mu$ M (in final concentration with lysate) at room temperature with 30  $\mu$ l of streptavidin-coated immunomagnetic beads (Calbiochem, San Diego CA). During this time,  $1 \times 10^6$  HeLa cells at 90% of confluence per peptide point assay were trypsinized, washed with 1 mL of phosphate-buffered saline (PBS), and centrifuged at 600 g and 4°C for 10 min. Cell pellets were lysed 10 min on ice with 400  $\mu$ l of lysis buffer (50 mM Tris pH 7.4, 200 mM NaCl, 10 mM EDTA, 20% Glycerol, 1% Nonidet P-40, 1 mM phenylmethylsulfonyl fluoride (PMSF), 10 mM NaF, 1 mM orthovanadate, and “complete mini EDTA free” protease inhibitor cocktail from Roche). Lysates were clarified at 13,000 g for 10 min at 4°C and after rotation with supernatant at 4°C for 2 h biotinylated peptides were pulled down with streptavidin magnetic beads and washed twice with 750  $\mu$ l of lysis buffer. Bound proteins and clarified lysates were analyzed by western blotting using PP2A<sub>1</sub> antibodies.

### Cellular Localization of biotinylated Peptides

A total of  $4 \times 10^4$  exponentially proliferating HeLa cells growing in a sub confluent monolayer were seeded per well on a Lab-Tek and incubated at 37°C, 5% CO<sub>2</sub>. Biotinylated peptides were added 48 h later to the cells at different concentrations for different periods of time. Cells were washed twice in PBS, and fixed with absolute ethanol for 10 min at -20°C before addition of 100  $\mu$ M of streptavidin HRP conjugate. After 30 min incubation at 37°C, cells were rinsed twice in PBS and incubated with DAB for around 10 min. Cells were washed in distilled water and mounted for microscopic examination.

### Quantification of Peptide Internalization

Before incubation, the peptides were pre-incubated for 1 h with streptavidin HRP conjugate in a 4:1 ratio. Cells at 80% confluence were incubated with different concentrations of peptide in 24-well plates. After 6 h, cells were washed twice in PBS, trypsinized and harvested in 1 ml of PBS and counted. Cells were lysed in 300  $\mu$ l of 0.1 M Tris pH 7.4, and 0.5% Nonidet P-40 buffer for 10 min on ice. A total of 50  $\mu$ l of cell lysate was mixed with 50  $\mu$ l of OPD buffer (51.4 mM Na<sub>2</sub>HPO<sub>4</sub> and 24.3 mM citric acid) then mixed with 100  $\mu$ l of OPD solution according to manufacturer's instructions. After 10 to 20 min, the reaction was stopped by adding 100  $\mu$ l of 1M HCl, and optical density was read at 490 nm.

### TUNEL Assay

TUNEL assays were performed according to manufacturer's instructions. A total of  $4 \times 10^4$  HeLa or SK-N-SH cells were seeded per well on a Lab-Tek II and incubated at 37°C, 5% CO<sub>2</sub>, biotinylated peptides were added to the cells 18 h later at different concentrations for different periods of time. Slides were rinsed three times in PBS and mounted with Vectashield containing

DAPI. After that the slides were examined by fluorescence microscopy.

### Annexin-V assays and evaluation of mitochondrial membrane potential ( $\Delta\Psi$ m)

Jurkat cells ( $2.5 \times 10^5$  cells in 400  $\mu$ L of complete RPMI-1640 medium) were incubated at 37°C and 5% CO<sub>2</sub> with different peptide concentrations. After 3 h, cells were washed in PBS and we used an Annexin-V-FITC to assess outer leaflet phosphatidylserine (PS) exposure in the plasma membrane as a means for the early detection of apoptotic cells. Staining was performed according to the manufacturer's instructions. We also used the cationic Dye DiOC<sub>6</sub>(3), which localizes into intact mitochondria, to measure  $\Delta\Psi$ m. DiOC<sub>6</sub>(3) was added at 20 nM for 15 to 30 min at 37°C in the dark. Cells were washed in PBS and immediately analyzed by flow cytometry. A total of 20,000 cells were analyzed in a FACScalibur flow cytometer (BD Biosciences, San Jose, CA).

### Supporting Information

**Figure S1** Comparison of the effect of protamine on PP2A<sub>1</sub> and on the phosphatase eluted from HIV-1 Vpr-Agarose column. Phosphorylase a phosphatase activities of purified PP2A<sub>1</sub> and from the pool of the 4 most active fractions eluted from HIV-1 Vpr-agarose column chromatography were assayed in the presence of increasing concentration of protamine added without pre-incubation. The activity in the absence of protamine was taken as 100%.

Found at: doi:10.1371/journal.pone.0013760.s001 (6.02 MB TIF)

**Figure S2** Effect of DPT-Vpr4 peptide on PP2A-interaction, cell penetration, and cell death. (A) Cell penetration was analyzed similarly to Fig. 2A in HeLa. (B) Co-precipitation of the DPT-Vpr4 peptide with PP2A in HeLa cell extracts. Experiment was performed similarly to Fig. 1D and the interaction with PP2A<sub>1</sub> was analyzed by immunoblotting using antibodies against the regulatory subunit PP2A-B $\alpha$ . (C) To monitor apoptosis in Jurkat cells treated with DPT-Vpr4 or with positive control Vpr71-96 peptides we used Annexin V (upper panel) or DiOC<sub>6</sub> (lower panel) assays as described in Materials and Methods. Statistical analysis was by Anova and significance was set at  $P < 0.05$ .

Found at: doi:10.1371/journal.pone.0013760.s002 (10.48 MB TIF)

**Figure S3** Co-precipitation of DPT-Vpr peptides with PP2A subunits in cell extracts. Co-precipitation of DPT-Vpr peptides with PP2A subunits in SK-N-SH (A) or in Jurkat (B). Immunoblotting was analysis was performed using antibodies against the PP2A-B $\alpha$  in SK-N-SH and PP2A catalytic subunit in HeLa cells. Found at: doi:10.1371/journal.pone.0013760.s003 (6.02 MB TIF)

### Acknowledgments

We thank Fernando Roncal and Angelita Rebollo for cellulose-bound Vpr peptides synthesis. This work is dedicated to Nicole Israël (initial collaboration-PTR-60).

### Author Contributions

Conceived and designed the experiments: AG. Performed the experiments: ANG JG AC XC PF. Analyzed the data: JG XC PF JHC. Wrote the paper: JHC AG.

### References

- Alimonti JB, Ball TB, Fowke KR (2003) Mechanisms of CD4+ T lymphocyte cell death in human immunodeficiency virus infection and AIDS. *J Gen Virol* 84: 1649–1661.
- Romani B, Engelbrecht S (2009) Human immunodeficiency virus type 1 Vpr: functions and molecular interactions. *J Gen Virol* 90: 1795–1805.

3. Stewart SA, Poon B, Jowett JB, Chen IS (1997) Human immunodeficiency virus type 1 Vpr induces apoptosis following cell cycle arrest. *J Virol* 71: 5579–5592.
4. Chen M, Elder RT, Yu M, O’Gorman MG, Selig L, et al. (1999) Mutational analysis of Vpr-induced G2 arrest, nuclear localization, and cell death in fission yeast. *J Virol* 73: 3236–3245.
5. Jacotot E, Ravagnan L, Loeffler M, Ferri KF, Vieira HL, et al. (2000) The HIV-1 viral protein R induces apoptosis via a direct effect on the mitochondrial permeability transition pore. *J Exp Med* 191: 33–46.
6. Jacotot E, Ferri KF, El Hamel C, Brenner C, Druilennec S, et al. (2001) Control of mitochondrial membrane permeabilization by adenine nucleotide translocator interacting with HIV-1 viral protein R and Bcl-2. *J Exp Med* 193: 509–519.
7. Garcia A, Cayla X, Guernon J, Dessauge F, Hospital V, et al. (2003) Serine/threonine protein phosphatases PP1 and PP2A are key players in apoptosis. *Biochimie* 85: 721–726.
8. Virshup DM, Shenolikar S (2009) From promiscuity to precision: protein phosphatases get a makeover. *Mol Cell* 33: 537–545.
9. Guernon J, Dessauge F, Dominguez V, Viallet J, Bonnefoy S, et al. (2006) Use of penetrating peptides interacting with PP1/PP2A proteins as a general approach for a drug phosphatase technology. *Mol Pharmacol* 69: 1115–1124.
10. Schwarze SR, Ho A, Vocero-Akbani A, Dowdy SF (1999) In vivo protein transduction: delivery of a biologically active protein into the mouse. *Science* 285: 1569–1572.
11. Arunagiri C, Macreadie I, Hewish D, Azad A (1997) A C-terminal domain of HIV-1 accessory protein Vpr is involved in penetration, mitochondrial dysfunction and apoptosis of human CD4+ lymphocytes. *Apoptosis* 2: 69–76.
12. Lum JJ, Cohen OJ, Nie Z, Weaver JG, Gomez TS, et al. (2003) Vpr R77Q is associated with long-term nonprogressive HIV infection and impaired induction of apoptosis. *J Clin Invest* 111: 1547–1554.
13. Tristem M, Marshall C, Karpas A, Hill F (1992) Evolution of the primate lentiviruses: evidence from vpx and vpr. *EMBO J* 11: 3405–3412.
14. Deniaud A, Brenner C, Kroemer G (2004) Mitochondrial membrane permeabilization by HIV-1 Vpr. *Mitochondrion* 4: 223–233.
15. De Noronha C, Takaori-Kondo A, Mc Entee M, Greene W (1993) The HIV-encoded protein Vpr associates with PP2A via the A subunit. *Mol Biol Cell* abstract n° 7355a.
16. Takadori-Kondo A, De Noronha C, Mc Entee M, Greene W (1996) Identification of a molecular mechanism for HIV-1 Vpr-induced G2 cell cycle arrest. *Int Conf AIDS* 11: 22 (abstract no LBA.6004).
17. Re F, Braaten D, Franke EK, Luban J (1995) HIV-1 Vpr arrests the cell cycle in G2 by inhibiting the activation of p34cdc2-cyclin B. *J Virol* 69: 6859–6864.
18. Zhao Y, Cao J, O’Gorman MR, Yu M, Yorgev R (1996) Effect of human immunodeficiency virus type 1 protein R (vpr) gene expression on basic cellular function of fission yeast *Schizosaccharomyces pombe*. *J Virol* 70: 5821–5826.
19. Masuda M, Nagai Y, Oshima N, Tanaka K, Murakami H, et al. (2000) Genetic Studies with the Fission Yeast *Schizosaccharomyces pombe* Suggest Involvement of Wee1, Ppa2, and Rad24 in Induction of Cell Cycle Arrest by Human Immunodeficiency Virus Type 1 Vpr. *J Virol* 74: 2636–2646.
20. Elder RT, Yu M, Chen M, Zhu X, Yanagida M, et al. (2001) HIV-1 Vpr Induces Cell Cycle G2 Arrest in Fission Yeast (*Schizosaccharomyces pombe*) through a Pathway Involving Regulatory and Catalytic Subunits of PP2A and Acting on Both Wee1 and Cdc25. *Virology* 287: 359–370.
21. Li G, Elder RT, Qin K, Park HU, Liang D, et al. (2007) Phosphatase Type 2A-dependent and -independent Pathways for ATR Phosphorylation of Chk1. *J Biol Chem* 282: 7287–7298.
22. Bourbigot S, Beltz H, Denis J, Morellet N, Roques BP, et al. (2005) The C-terminal domain of the HIV-1 regulatory protein Vpr adopts an antiparallel dimeric structure in solution via its leucine-zipper-like domain. *Biochem J* 387: 333–341.
23. Guernon J, Dessauge F, Traincard F, Cayla X, Rebollo A, et al. (2006) A PKA survival pathway inhibited by DPT-PKI, a new specific cell permeable PKA inhibitor, is induced by T. annulata in parasitized B-lymphocytes. *Apoptosis* 11: 1263–1273.
24. Coeytaux E, Coulaud D, Le Cam E, Danos O, Kichler A (2003) The cationic amphipathic alpha-helix of HIV-1 viral protein R (Vpr) binds to nucleic acids, permeabilizes membranes, and efficiently transfects cells. *J Biol Chem* 278: 18110–18116.
25. Taguchi T, Shimura M, Osawa Y, Suzuki Y, Mizoguchi I, et al. (2004) Nuclear trafficking of macromolecules by an oligopeptide derived from Vpr of human immunodeficiency virus type-1. *Biochem Biophys Res Commun* 320: 18–26.
26. Janoo A, Morrow PW, Tung HY (2005) Activation of protein phosphatase-2A1 by HIV-1 Vpr cell death causing peptide in intact CD4(+) T cells and in vitro. *J Cell Biochem* 94: 816–825.
27. Andersen JL, Le Rouzic E, Planelles V (2008) HIV-1 Vpr: mechanisms of G2 arrest and apoptosis. *Exp Mol Pathol* 85: 2–10.
28. Andersen JL, DeHart JL, Zimmerman ES, Ardon O, Kim B, et al. (2006) HIV-1 Vpr-Induced Apoptosis Is Cell Cycle Dependent and Requires Bax but Not ANT. *PloSPathogens* 2: e127.
29. Lamine A, Caumont-Sarcos A, Chaix ML, Saez-Cirion A, Rouzioux C, et al. (2007) Replication-competent HIV strains infect HIV controllers despite undetectable viremia. *AIDS* 21: 1043–1045.
30. Levy DN, Refaeli Y, MacGregor RR, Weiner DB (1994) Serum Vpr regulates productive infection and latency of human immunodeficiency virus type 1. *Proc Natl Acad Sci U S A* 91: 10873–10877.
31. Levy DN, Refaeli Y, Weiner DB (1995) Extracellular Vpr protein increases cellular permissiveness to human immunodeficiency virus replication and reactivates virus from latency. *J Virol* 69: 1243–1252.
32. Patel CA, Mukhtar M, Harley S, Kulkosky J, Pomerantz RJ (2002) Lentiviral expression of HIV-1 Vpr induces apoptosis in human neurons. *J Neurovirol* 8: 86–99.
33. Piller SC, Ewart GD, Jans DA, Gage PW, Cox GB (1999) The amino-terminal region of Vpr from human immunodeficiency virus type 1 forms ion channels and kills neurons. *J Virol* 73: 4230–4238.
34. Huang MB, Weeks O, Zhao LJ, Saltarelli M, Bond VC (2000) Effects of extracellular human immunodeficiency virus type 1 vpr protein in primary rat cortical cell cultures. *J Neurovirol* 6: 202–220.
35. Sabbah EN, Roques BP (2005) Critical implication of the (70-96) domain of human immunodeficiency virus type 1 Vpr protein in apoptosis of primary rat cortical and striatal neurons. *J Neurovirol* 11: 489–502.
36. Wheeler ED, Achim CL, Ayyavoo V (2006) Immunodetection of human immunodeficiency virus type 1 (HIV-1) Vpr in brain tissue of HIV-1 encephalitic patients. *J Neurovirol* 12: 200–210.
37. Jones GJ, Barsby NL, Cohen EA, Holden J, Harris K, et al. (2007) HIV-1 Vpr causes neuronal apoptosis and in vivo neurodegeneration. *J Neurosci* 27: 3703–3711.
38. Overall IP, Luthert PJ, Lantos PL (1993) Neuronal number and volume alterations in the neocortex of HIV infected individuals. *J Neurol Neurosurg Psychiatry* 56: 481–486.
39. Fuller RA, Westmoreland SV, Ratai E, Greco JB, Kim JP, et al. (2004) A prospective longitudinal in vivo 1H MRS spectroscopy study of the SIV/macaque model of neuroAIDS. *BMC Neurosci* 5: 10.
40. Sontag E, Nunbhakdi-Craig V, Sontag JM, Diaz-Arriatia R, Ogris E, et al. (2007) Protein Phosphatase 2A Methyltransferase Links Homocysteine Metabolism with Tau and Amyloid Precursor Protein Regulation. *The J Neuroscience* 27: 2751–2759.
41. Zhao LJ, Mukherjee S, Narayan O (1994) Biochemical mechanism of HIV-1 Vpr function. Specific interaction with a cellular protein. *J Biol Chem* 269: 15577–15582.
42. Zhao LJ, Wang L, Mukherjee S, Narayan O (1994) Biochemical mechanism of HIV-1 Vpr function. Oligomerization mediated by the N-terminal domain. *J Biol Chem* 269: 32131–32137.
43. Waekens E, Goris J, Merlevede W (1987) Purification and properties of polycation-stimulated phosphorylase phosphatases from rabbit skeletal muscle. *J Biol Chem* 262: 1049–1059.
44. Bosch M, Cayla X, Van Hoof C, Hemmings BA, Ozon R, et al. (1995) The PR55 and PR65 subunits of protein phosphatase 2A from *Xenopus laevis*. molecular cloning and developmental regulation of expression. *Eur J Biochem* 230: 1037–1045.
45. Frank R, Overwin H (1996) SPOT synthesis. Epitope analysis with arrays of synthetic peptides prepared on cellulose membranes. *Methods Mol Biol* 66: 149–169. 38.
46. Chen M, Elder RT, Yu M, O’Gorman MG, Selig L, et al. (1999) Mutational analysis of Vpr-induced G2 arrest, nuclear localization, and cell death in fission yeast. *J Virol* 73: 3236–3245.
